# Supplementary material for: Different molecular bases underlie the mitochondrial respiratory activity in the homoeothermic spadices of Symplocarpus renifolius and the transiently thermogenic appendices of Arum maculatum
Source: Oxford University Press journal article supplement (doi:10.1042/bj20111978), 2012-04-20
Supplement: bj4450237add.pdf [file bj4450237add.pdf]

```

SrNDB1  1 MRFTGASSTIY----QAVRRNSAFSKLLVVFVAVGGGLVYADANPNHGLITEQSEVSAKAKVVVLTGTWAGTSLKLNLD 76
SrNDB2  1 MRFTGASSTIY----QAVRRNSAFSKLLVVFVAVGGGLVYADANPNHSLITEQSEVPAKKVVVLTGTWAGTSLKLNMD 76
AmNDB1  1 MPFPTS---GFDLASGLLRRNPGFSRLLVVFVAVGGGLVYADSNADLGVPSEQNKMPTKKVVLITGTWAGTSLKLNLD 77
      * *          *** ** ***** **          **          ***** **
      + + + + + + +
SrNDB1  77 SSLYDVQVVS PRNYFAFTPLLPSVTCGTVDARSVVEPIRKIIKKKGGEIKFWEAEACYNIDPGNKKVHCRSNIGTNLENG 156
SrNDB2  77 SSLYDVQVVS PRNYFAFTPLLPSVTCGTVDARSVVEPIRKIIKKKGGEIRFWEAEACYNVDPVNKKVHCRSNIGTNLENG 156
AmNDB1  78 SSLYDVHVVS PRNYFAFTPLLPSVTCGTVDARSIVEPVRNIIRKKGGVKFEADCKIDPTTKVKYCRSNVGTNLENG 157
      ***** ** ***** ** ** ***** ** ** ***** **
      + + -
SrNDB1  157 EFVVEYDYLVLGAKANTFNTPGVVEHCHFLKEVEDALRIRRSVMDCFERASLPLNLTDEERKTNLHFIIVGGGPTGVEF 236
SrNDB2  157 EFVVEYDYLVALGAKANTFNTPGVVEHCHFLKEVEDALRIRRSVMDCFERASLPLNLTDEERKTNLHFIIVGGGPTGVEF 236
AmNDB1  158 EFVVDYDYLVAIGARANTFNTPGVTENCHFLKEVEDAQIRRSVIDCFERASLPLTSDDEERKKNLHFVIVGGGPTGVEF 237
      ***** ** ***** ** ***** ** ***** ** ***** ** ***** ** ***** ** ***** **
      + + + + +
SrNDB1  237 AAELHDFVSEDI AKLYPRVRDLVKISVIEAGEHILTMFDKRITAFEAEKFKRDGIDVKTGYRVVKVSDKEIIMTGKATGE 316
SrNDB2  237 AAELHDFVSEDI AKLYPRVRDLVKISVIEAGEHILTMFDKRITAFEAEKFKREGIDVKTGYRVVKVSDKDIIMTGKATGE 316
AmNDB1  238 AAELHDFVNEDEL SKLYPKVQELVKISVIEAGEHILTMFDKRITFEAEGKFQREGIDVKTGYKVVKVDKISMSVSKEAGE 317
      ***** ** ***** ** ***** ** ***** ** ***** ** ***** ** ***** ** ***** **
      + +          + + +
SrNDB1  317 TAVPYGMAVWSTGIGTRPVILDFMKIQGQDRRVLATDEWLRVRGCDGVYALGDCATISQRKVMDDISAIFKVADKDNSG 396
SrNDB2  317 IAIYGYMAVWSTGIGTRPVILDFMKIQGQADRRVLATDEWLRVRGCDGVYALGDCATISQRKVMDDISAIFKVADKDNSG 396
AmNDB1  318 IDVPYGYMAVWSTGIGTRPVILDFMKIQGQDRRVLATDEWLRVRGCDGVYALGDCATIQRVRVMDDISSIFRVADKDNSG 397
      ***** ** ***** ** ***** ** ***** ** ***** ** ***** ** ***** ** ***** **
      # # #
SrNDB1  397 TLTVKEIQDVLGDICERYPQVELYLKSKQMDFVDLLEDSEKGNAKKESIELDIEQFKKALAHVDFQVKNLPATAQVAQQ 476
SrNDB2  397 TLTVKEIQDVLGDICERYPQVELYLKSKQMDFVDLLEDSEKGNAKKESIELDIEQFKKALAHVDFQVKNLPATAQVAQQ 476
AmNDB1  398 TLTVKEINDVLGDICERYPQVELYLKSKQMKSVDLLEKSEGNAKKETMELNIEQFKKALENVDSQVKNLPATAQVASQQ 477
      ***** ** ***** ** ***** ** ***** ** ***** ** ***** ** ***** ** ***** **
      ## ##
SrNDB1  477 GYLARCFNVMKNVEENPEGRLMRRESGRHRFRPFYRHLGQFAPLGGEQTAALPGDWISIGYGSQNLWYSVYASKQVS 556
SrNDB2  477 GYLARCFNVMKNVEENPEGRLMRRESGRHRFRPFYRHLGQFAPLGGEQTAALPGDWISIGYGSQNLWYSVYASKQVS 556
AmNDB1  478 GAYLARCFNLLQNI DVNPEGPIRIRRESGRHRFRPFYRHLGQFAPLGGEQTAALPGDWISIGYGSQNLWYSVYASKQVS 557
      * * * * * * * * * * * * * * * * * * * * * * * * * * * * * * * * * * * * * * * * * *
SrNDB1  557 WRTRLSVVDWTRRFIFGRDSSCI 580
SrNDB2  557 WRTRLSVVDWTRRFIFGRDSSCI 580
AmNDB1  558 WRTRVAVVSNWTRRFIFGRDSSSL 581
      ***** ** ***** ** ***** ** ***** ** ***** ** ***** ** ***** ** ***** **

```

**Figure S2 Deduced amino acid sequences of SrNDB1, SrNDB2 and AmNDB1**

Sequence alignments of SrNDB1, SrNDB2 and AmNDB1 shown in the same manner as described in Figure S1. In addition, # under the alignments indicates the putative positions for a Ca<sup>2+</sup>-binding EF-hand motif.

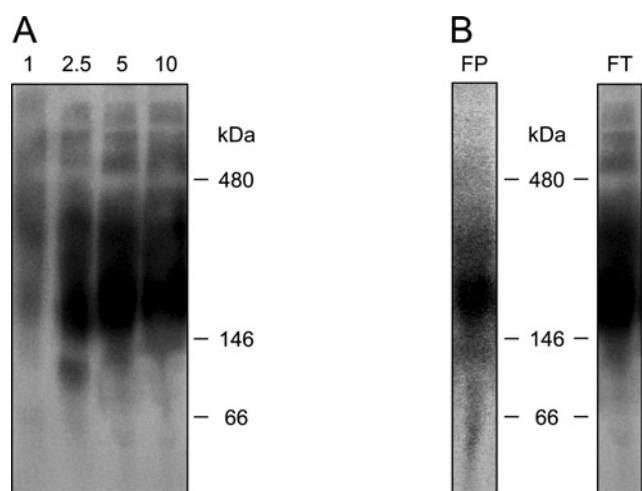

**Figure S3 Immunological identification of AOX in *S. renifolius* mitochondria following 1D BN-PAGE under a range of experimental conditions**

(A) *S. renifolius* mitochondria, which had experienced two freeze–thaw cycles, were solubilized using four different concentrations of digitonin, namely 1, 2.5, 5 and 10 g/g of protein, and were then resolved on to a 1D BN-PAGE gel. AOX was immunologically detected as shown in Figure 4(A) of the main text. The numbers above each lane indicate the digitonin concentrations. The molecular masses of standard proteins are indicated to the right-hand side of the image in kDa. The third lane from the left end is identical to the SR lane in Figure 4(A) of the main text. (B) Freshly-prepared *S. renifolius* mitochondria which had undergone no freeze–thaw cycles were solubilized using 5 g digitonin/g of protein, and were then run on a 1D BN-PAGE gel. AOX was immunologically detected as shown in Figure 4(A) of the main text. In the right image as a comparison, AOX was detected in mitochondria that had undergone two freeze–thaw cycles, which is identical to the SR lane in Figure 4(A) of the main text. The molecular masses of the standard proteins are shown between the two images in kDa. FP, freshly-prepared mitochondria; FT, mitochondria that had undergone two freeze–thaw cycles.

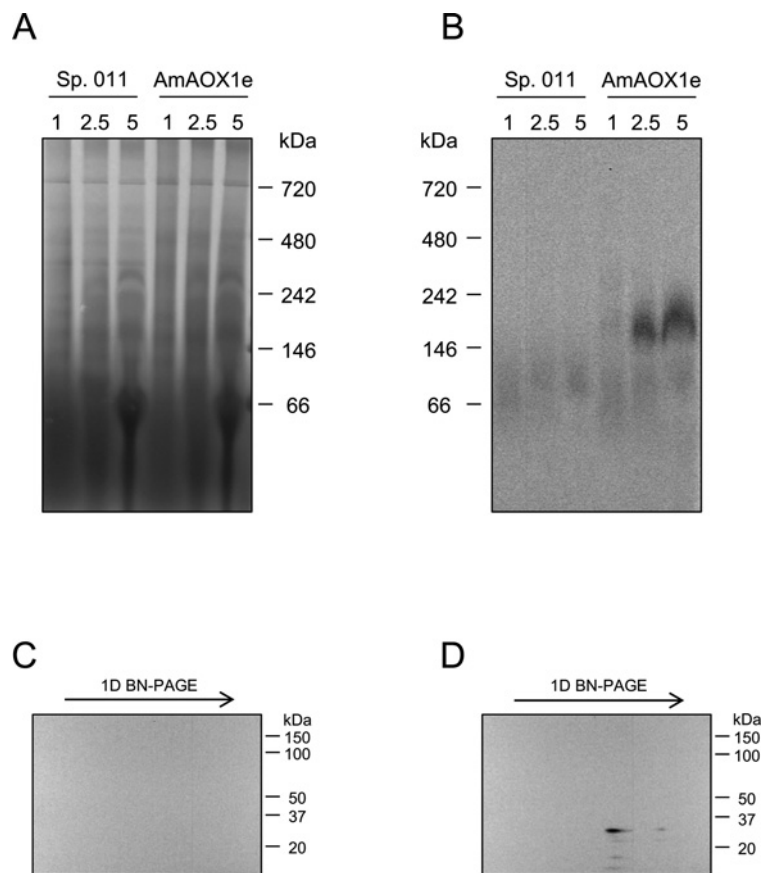

**Figure S4 Immunological identification of AOX in mitochondria from non-transformed *S. pombe* and its transformant expressing AmAOX1e**

Mitochondria that had undergone two freeze–thaw cycles were solubilized by digitonin and were subjected to Western blotting after either 1D BN-PAGE or 2D BN/SDS/PAGE. **(A)** The proteins were stained by Coomassie Brilliant Blue after 1D BN-PAGE to show their appropriate loading and separation. **(B)** Immunological detection of AOX after 1D BN-PAGE. Numbers above each lane represent digitonin concentrations in g/g of protein. **(C)** Immunological detection of AOX in mitochondria from the non-transformed yeast after 2D BN/SDS-PAGE. The mitochondria were solubilized using 5 g of digitonin/g of protein. The result is presented as in Figure 4(B) of the main text. **(D)** Immunological detection of AOX in mitochondria from the transformant after 2D BN/SDS/PAGE. The results were shown in the same manner as in **(C)**.

**Table S1** DNA sequences of the primers used for RT-PCR and real-time PCR

| Name       | Sequence (5'→3')           |
|------------|----------------------------|
| NDAF1      | AACCACATGGTNTTCAC          |
| NDAF2      | CAYGCTCAAGAAATAAGGAA       |
| NDAF3      | ATCTTCTCCGCGAGGT           |
| NDAR1      | ACAGTWGCCATGCTTCC          |
| NDAR2      | CTTTCTGCAACCTGAGC          |
| NDAR3      | ACCTGTTCTCCAGCTCAC         |
| NDBF1      | AAGGAAGTAGAGGATGCTCA       |
| NDBF2      | ACTGGWGTGGARTTTGC          |
| NDBF3      | CTGCWAGCTTCATGAYT          |
| NDBF4      | CATGTTTGACAARAGAAATYAC     |
| NDBR1      | GCRACCTGAGCTGTTGC          |
| NDBR2      | ACTTGYYTGCTKGCATA          |
| NDBR3      | CCTCCCARTGGAGCAAA          |
| NDBR4      | ATRTCTTCCATGACTTTGCG       |
| EF1aF1     | ACATTGGGTCATTGGCCA         |
| EF1aR1     | ACCAATTGGGTCCTTCTT         |
| SrNDAF1    | GTGAAGGATTACGTACGAGTTACCC  |
| SrNDAF2    | GATTACACAAGTGTTCGGCGTC     |
| SrNDAR1    | GGGTAACCTCGTACGTAATCCTTCC  |
| SrNDAR2    | CGTACAACAACCTATCAAGACACC   |
| SrNDBF1    | GGTATGGCTGTCTGGTCTACTGG    |
| SrNDBF2    | GTGATGGTGTGTATGCACTTGG     |
| SrNDBF3    | ATCTCCATTTCTGCTGTGGTTC     |
| SrNDBR1    | CCAAGTGCATACACACCATCAC     |
| SrNDBR2    | CCAGTAGACCAGACAGCCATACC    |
| SrNDBR3    | CAAGCATTCTGCAATTAGCAGC     |
| AmNDAF1    | GTAAGGATTACGTTCCGCGTGAC    |
| AmNDAF2    | GAACAAGCGAGAAATTGACCTC     |
| AmNDAF3    | TGCGTTCTAGTGCCCTCCTC       |
| AmNDAR1    | GTCACGCGAACGTAATCCTTAC     |
| AmNDAR2    | TTCCACACATCTGCAGTCTCC      |
| AmNDAR3    | TGTAAGTATCTGGTAGGTTTCTGC   |
| AmNDBF1    | GAATGGCTGTCTGGTCTACTGG     |
| AmNDBF2    | AGAATCTCTAGAGGGAACGCTTGG   |
| AmNDBR1    | CCAAGTGCATAAACCCCATCAC     |
| AmNDBR2    | ACCTGGGATTTTCGGTGATG       |
| AmSrEF1aF1 | CGTCAAGTTTGCCGAGATCC       |
| AmSrEF1aR1 | GCTCAGCCTTCAGCTTGTCAAG     |
| AmSrEF1aR2 | CTCTTGTTTCATCTCAGCAGCTTC   |
| SrEF1aF1   | ACATGGGGCTTCTCAGCA         |
| SrEF1aR1   | CCACTATTATAACTAGTCAACATGCC |
| AmEF1aF1   | ACGGCCAATCTCTGGATC         |
| AmEF1aR1   | GGAACGGTGGACAAGGAG         |
| rtNDAF1    | GACTGTGCAGGTTTTCT          |
| rtNDAR1    | TAGAACCTGTCTCCAGC          |
| rtNDBF1    | CATATTTTGACCATGTTTGA       |
| rtNDBR1    | CAGTAGACCAGACAGCCAT        |
| rtEF1aF1   | AGCATTGTGGTCATTGG          |
| rtEF1aR1   | CTCTTGTTTCATCTCAGCAG       |

Received 12 December 2011/13 April 2012; accepted 19 April 2012

Published as BJ Immediate Publication 19 April 2012, doi:10.1042/BJ20111978
